# Supplementary material for: Construction of tetrahedral CoO4 vacancies for activating the high oxygen evolution activity of Co3−xO4−δ porous nanosheet arrays
Source: Royal Society of Chemistry journal article supplement (doi:10.1039/d0nr00744g), 2020-01-01
Supplement: d0nr00744g1.pdf [file d0nr00744g1.pdf]

## Constructing tetrahedral $\text{CoO}_4$ vacancies for activating the high oxygen evolution activity of $\text{Co}_{3-x}\text{O}_{4-\delta}$ porous nanosheet arrays

Shenghua Ye, Yu Zhang, Wei Xiong, Tingting Xu, Peng Liao, Pingyu Zhang, Xiangzhong Ren, Chuanxin He, Lirong Zheng, Xiaoping Ouyang, Qianling Zhang,\* and Jianhong Liu,\*

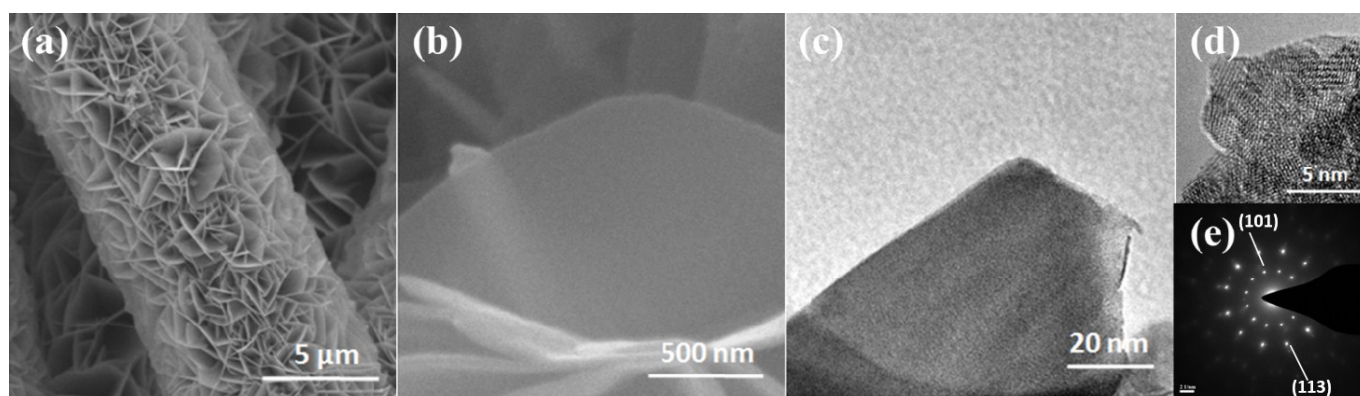

Figure S1 (a–b) SEM, (c) TEM, (d) HRTEM images and (e) SAED pattern of  $\alpha\text{-Co(OH)}_2$  NAs/CFC.

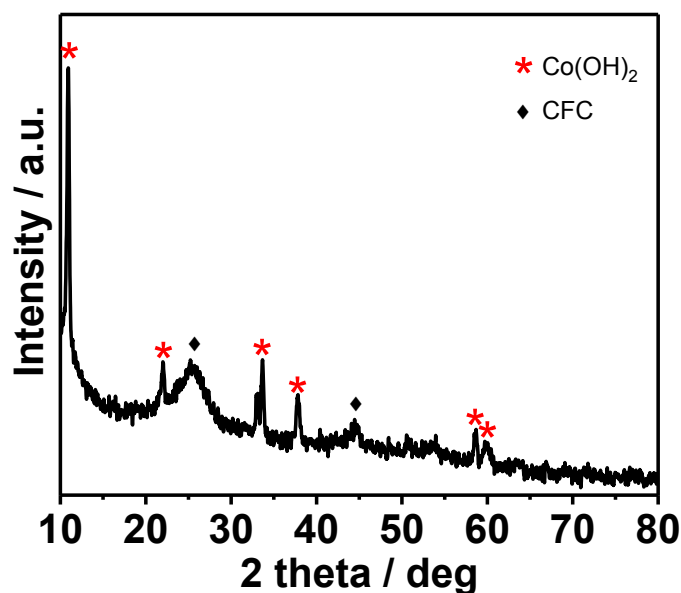

Figure S2 XRD pattern of  $\alpha\text{-Co(OH)}_2$  NAs/CFC.

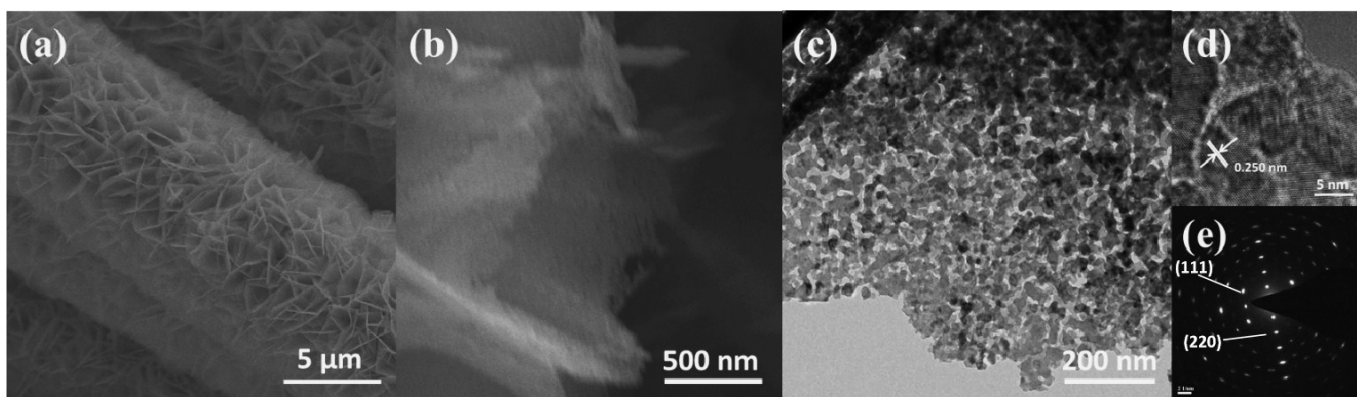

**Figure S3** (a–b) SEM, (c) TEM, and (d) HRTEM images, and (e) SAED pattern of CoO PNAs/CFC.

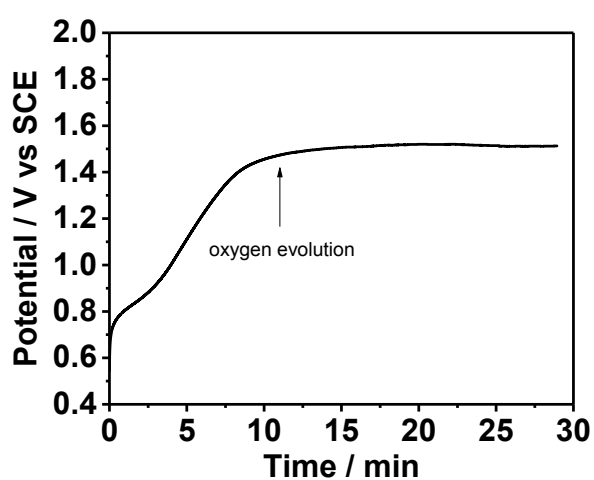

**Figure S4** E-t curve during in situ anodic oxidation of CoO PNAs/CFC in a 0.01 M  $(\text{NH}_4)_2\text{SO}_4$  solution.

As shown in Figure S4, the applied potential was lower and increased over time in the first 10 min of the in situ oxidation process. At this stage, CoO gradually transformed to  $\text{Co}_{3-x}\text{O}_{4-\delta}$ , and the color of the sample changed from brown to black. After ~10 min, the potential remained stable, and some continuous bubbles appeared, indicating that CoO was thoroughly transformed to  $\text{Co}_{3-x}\text{O}_{4-\delta}$  and the  $\text{H}_2\text{O}$  in the  $(\text{NH}_4)_2\text{SO}_4$  solution began to decompose to  $\text{O}_2$  at the anode. To guarantee thoroughly transformed of the sample, we performed the in situ oxidation process for 20 min.

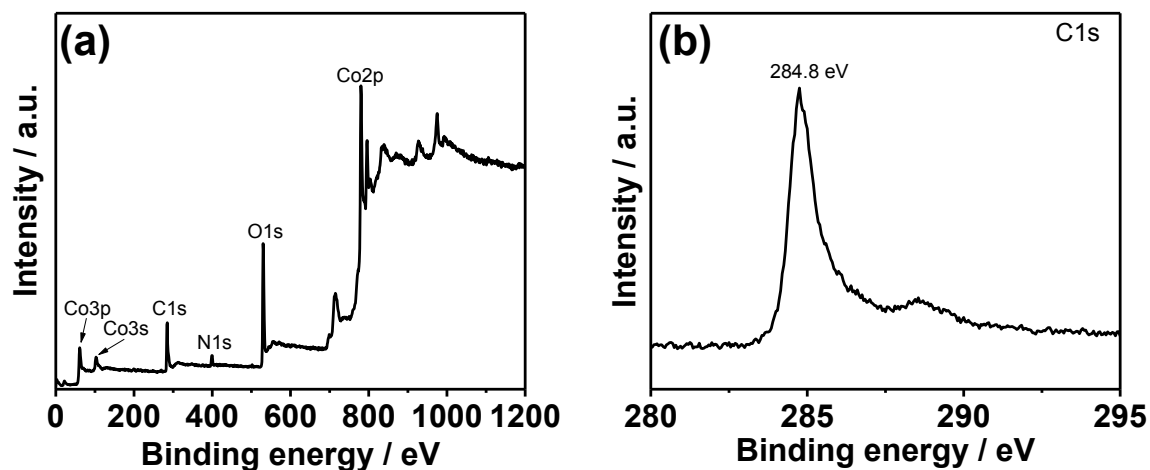

Figure S5 (a) Survey and (b) C1s spectra of  $\text{Co}_{3-x}\text{O}_{4-\delta}$  PNAs/CFC.

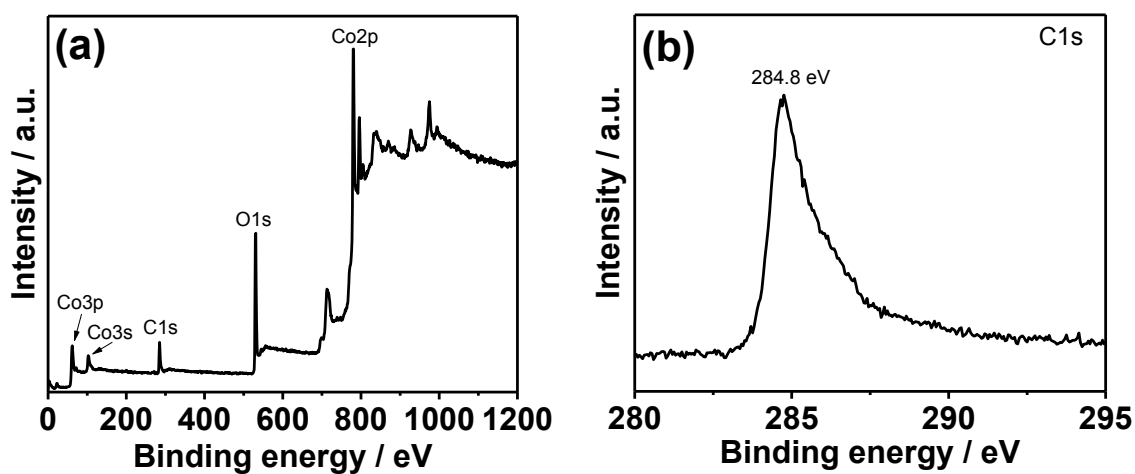

Figure S6 (a) Survey and (b) C1s spectra of  $\text{Co}_3\text{O}_4$  PNAs/CFC.

The survey spectra of  $\text{Co}_{3-x}\text{O}_{4-\delta}$  PNAs/CFC and  $\text{Co}_3\text{O}_4$  PNAs/CFC, shown in Figures S5–6, suggest that only C, O, and Co can be detected, along with trace amounts of N that originate from absorbed  $\text{NH}_4^+$  on the surface.

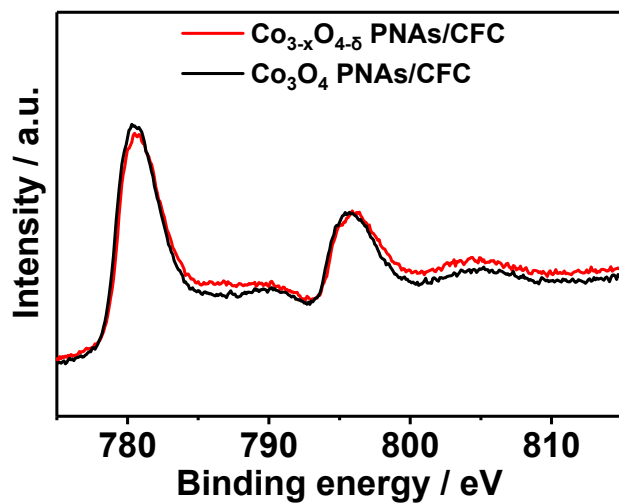

Figure S7 Co2p spectra of  $\text{Co}_{3-x}\text{O}_{4-\delta}$  PNAs/CFC and  $\text{Co}_3\text{O}_4$  PNAs/CFC.

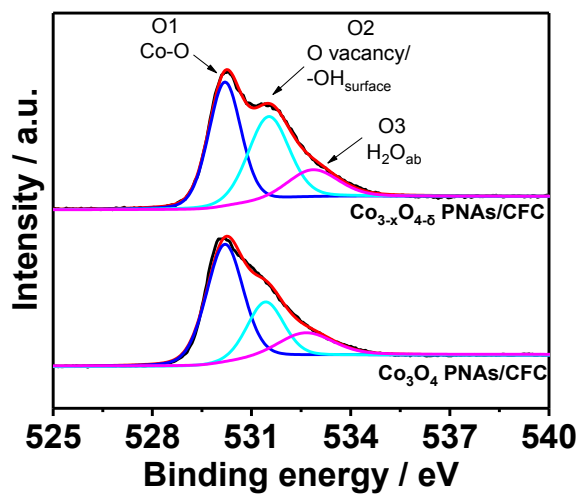

Figure S8 O1s spectra of  $\text{Co}_{3-x}\text{O}_{4-\delta}$  PNAs/CFC and  $\text{Co}_3\text{O}_4$  PNAs/CFC.

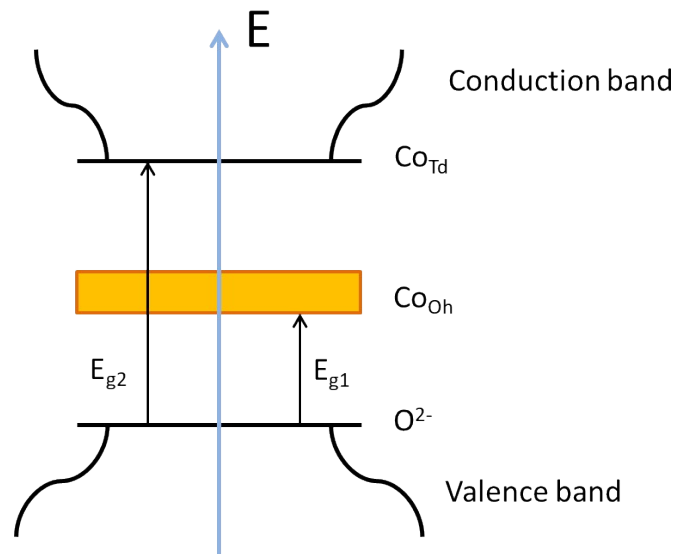

Figure S9 Electronic band structure of  $\text{Co}_3\text{O}_4$ .<sup>[1]</sup>

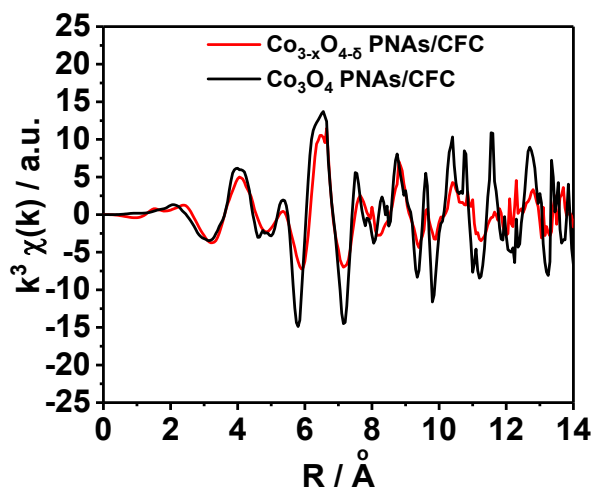

Figure S10 EXAFS oscillation of Co K-edge of  $\text{Co}_{3-x}\text{O}_{4-\delta}$  PNAs/CFC and  $\text{Co}_3\text{O}_4$  PNAs/CFC.

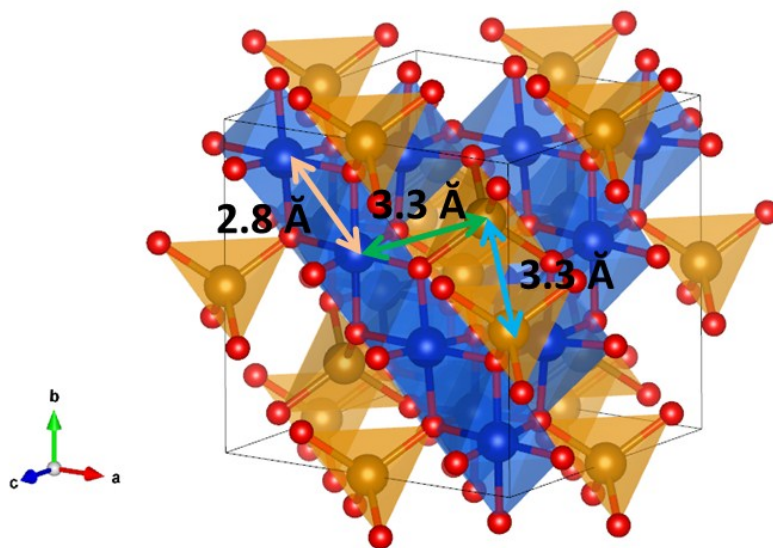

Figure S11 Crystalline structure of  $\text{Co}_3\text{O}_4$ .

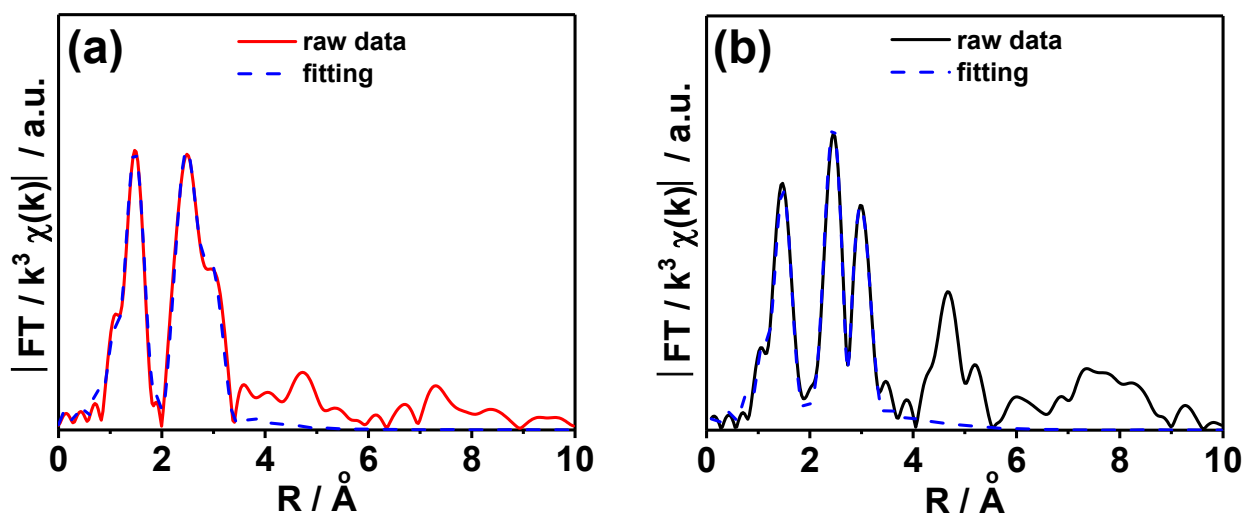

Figure S12 EXAFS fittings of Co K-edge of (a)  $\text{Co}_{3-x}\text{O}_{4-\delta}$  PNAs/CFC and (b)  $\text{Co}_3\text{O}_4$  PNAs/CFC.

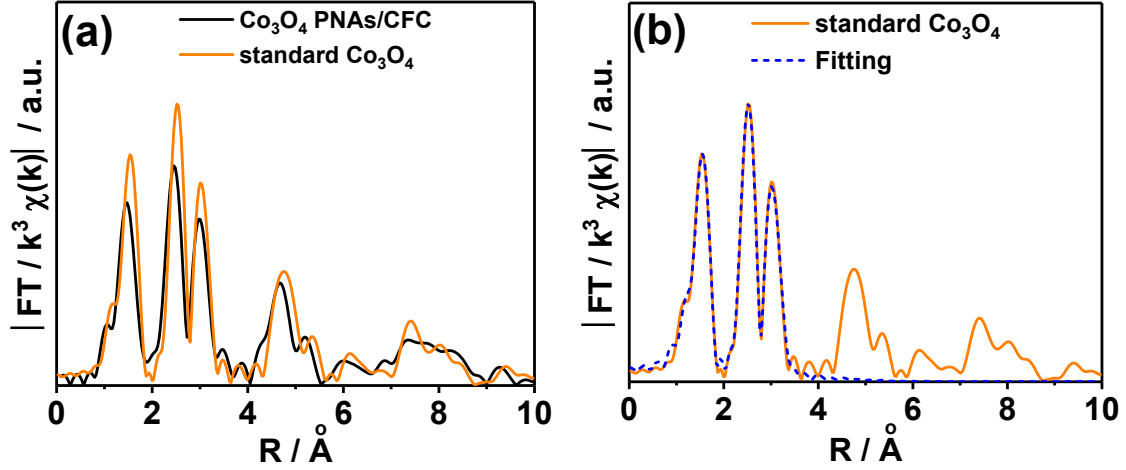

**Figure S13** (a) FT-EXAFS of Co K-edge for  $\text{Co}_{3-x}\text{O}_{4-\delta}$  PNAs/CFC and standard  $\text{Co}_3\text{O}_4$ , and (b) EXAFS fitting of standard  $\text{Co}_3\text{O}_4$ .

**Table S1.** EXAFS fitting parameters of the Co K-edge for various samples.

| Sample                                                    | Shell                              | CN <sup>a</sup> | R (Å) <sup>b</sup> | $\sigma^2$ (Å <sup>2</sup> ·10 <sup>3</sup> ) <sup>c</sup> | $\Delta E_0$ (eV) <sup>d</sup> | R factor (%) |
|-----------------------------------------------------------|------------------------------------|-----------------|--------------------|------------------------------------------------------------|--------------------------------|--------------|
| <b>Co<sub>3-x</sub>O<sub>4-δ</sub></b><br><b>PNAs/CFC</b> | Co-O                               | 3.9             | 1.92               | 4.5                                                        | -3.5                           | 1.0          |
|                                                           | Co <sub>Oh</sub> -Co <sub>Oh</sub> | 3.8             | 2.86               | 7.8                                                        | -4.4                           |              |
|                                                           | Co-Co <sub>Td</sub>                | 6.6             | 3.32               | 9.3                                                        | -8.6                           |              |
| <b>Co<sub>3</sub>O<sub>4</sub></b><br><b>PNAs/CFC</b>     | Co-O                               | 5.3             | 1.92               | 4.0                                                        | -5.6                           | 0.8          |
|                                                           | Co <sub>Oh</sub> -Co <sub>Oh</sub> | 4.0             | 2.85               | 3.9                                                        | -6.6                           |              |
|                                                           | Co-Co <sub>Td</sub>                | 8.1             | 3.35               | 6.2                                                        | -8.9                           |              |
| <b>Standard</b><br><b>Co<sub>3</sub>O<sub>4</sub></b>     | Co-O                               | 5.3             | 1.92               | 3.3                                                        | 5.3                            | 0.3          |
|                                                           | Co <sub>Oh</sub> -Co <sub>Oh</sub> | 4.0             | 2.85               | 3.4                                                        | 2.9                            |              |
|                                                           | Co-Co <sub>Td</sub>                | 8.0             | 3.36               | 7.6                                                        |                                |              |

<sup>a</sup> CN: coordination numbers; <sup>b</sup> R: bond distance; <sup>c</sup>  $\sigma^2$ : Debye-Waller factors; <sup>d</sup>  $\Delta E_0$ : the inner potential correction. R factor: goodness of fit.  $S_0^2$ , 0.847, was obtained from the experimental EXAFS fit of the  $\text{Co}_3\text{O}_4$  reference, by fixing CN as the known crystallographic value to all of the samples.

In normal  $\text{Co}_3\text{O}_4$ , CN of Co-O in  $\text{CoO}_6$  octahedrons and  $\text{CoO}_4$  tetrahedrons is 6 and 4, respectively, the ratio of  $\text{CoO}_6$  octahedrons and  $\text{CoO}_4$  tetrahedrons in  $\text{Co}_3\text{O}_4$  is 2:1, thus the average coordination number of Co-O should be calculated as 5.33, which complies with the result of  $\text{Co}_3\text{O}_4$  PNAs/CFC in Table S1.

The CN of Co-O and Co-Co of  $\text{Co}_3\text{O}_4$  PNAs/CFC are similar to that of standard  $\text{Co}_3\text{O}_4$  with larger  $\sigma^2$  value, indicating that  $\text{Co}_3\text{O}_4$  PNAs/CFC presents typical chemical structure of  $\text{Co}_3\text{O}_4$  with slightly higher disorder degree.

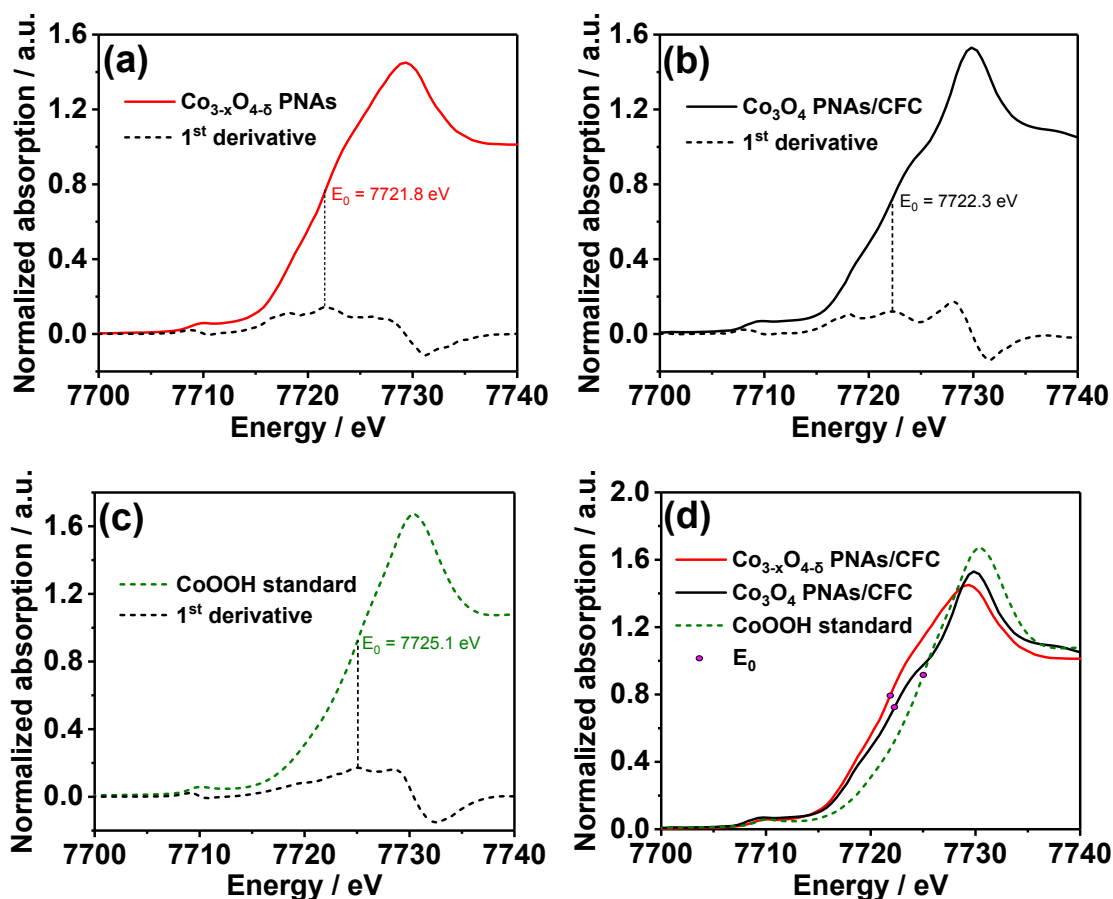

**Figure S14** The white line of XANES and the first-order derivative of (a)  $\text{Co}_{3-x}\text{O}_{4-\delta}$  PNAs/CFC, (b)  $\text{Co}_3\text{O}_4$  PNAs/CFC and (c) CoOOH standard; (d) The white line of XANES and threshold energy ( $E_0$ ) of  $\text{Co}_{3-x}\text{O}_{4-\delta}$  PNAs/CFC,  $\text{Co}_3\text{O}_4$  PNAs/CFC and CoOOH standard.

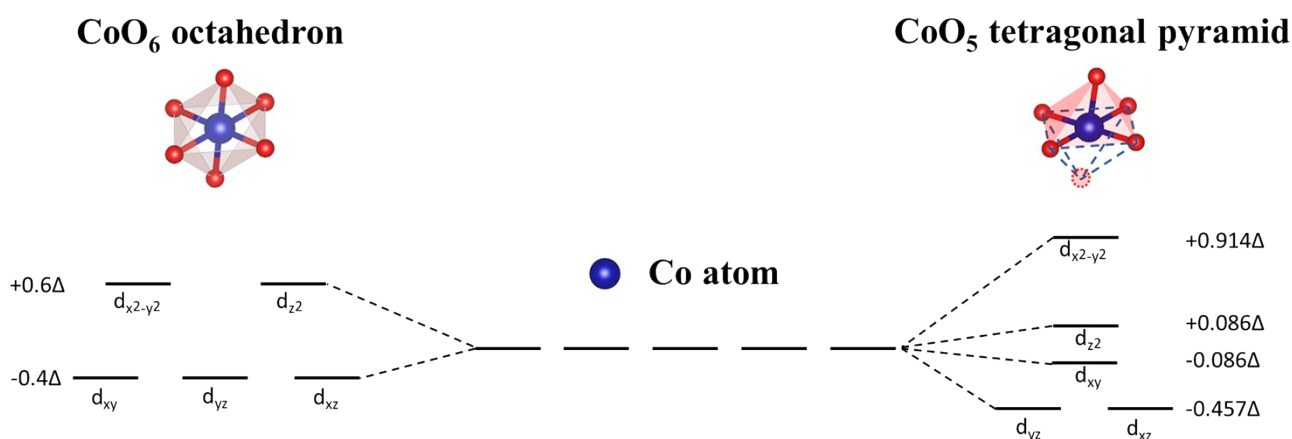

**Figure S15** Splitting of 3d orbits of Co atom in octahedral and tetragonal pyramidal coordinative fields.



**Table S2.** Electrocatalytic activities of various Co<sub>3</sub>O<sub>4</sub> OER catalysts.

| Electrocatalysts                                              | $\eta_{10 \text{ mA cm}^{-2}}$<br>/ mV | Tafel slope<br>/ mV dec <sup>-1</sup> | References                                         |
|---------------------------------------------------------------|----------------------------------------|---------------------------------------|----------------------------------------------------|
| Co <sub>3-x</sub> O <sub>4-δ</sub> PNAs/CFC                   | 291                                    | 58.12                                 | This work                                          |
| Co <sub>3</sub> O <sub>4</sub> /CoO                           | 302                                    | 68.6                                  | <i>Small</i> 2019, 15, 1904903                     |
| Co <sub>3</sub> O <sub>4</sub> @BP                            | 400                                    | 63                                    | <i>ACS Appl. Mater. Interfaces</i> 2019, 11, 17459 |
| Se/Ni-Co <sub>3</sub> O <sub>4</sub> -0.4/CP                  | 290                                    | 69.9                                  | <i>ACS Sustainable Chem. Eng.</i> 2019, 7, 11901   |
| Co <sub>3</sub> O <sub>4</sub> @Z67-N700@CeO <sub>2</sub>     | 350                                    | 80.7                                  | <i>J. Mater. Chem. A</i> 2019, 7, 25853            |
| CoFe LDH/Co <sub>3</sub> O <sub>4</sub>                       | 290                                    | 77                                    | <i>ChemSusChem</i> 2019, 12, 4442                  |
| Co <sub>3</sub> O <sub>4</sub> /NC-350                        | 298                                    | 69                                    | <i>Small</i> 2019, 15, 1904260                     |
| Co <sub>3</sub> O <sub>4-x</sub> HoNPs@HPNCS-60               | 313                                    | 37.7                                  | <i>Angew. Chem. Int. Ed.</i> 2019, 58, 13840       |
| Co <sub>3</sub> O <sub>4</sub> /Ag@NrGO                       | 437                                    | -                                     | <i>Chem. Eur. J.</i> 2018, 24, 14816               |
| Co <sub>3</sub> O <sub>4</sub> /Co-Fe oxide DSNBs             | 297                                    | 61                                    | <i>Adv. Mater.</i> 2018, 30, 1801211               |
| CoO <sub>x</sub> -4h                                          | 306                                    | 67                                    | <i>Nano Energy</i> 2018, 43, 110                   |
| Co <sub>3</sub> O <sub>4</sub> nanosheets                     | 330                                    | 57.8                                  | <i>ACS Appl. Mater. Interfaces</i> 2017, 9, 16159  |
| V <sub>O</sub> -Co <sub>3</sub> O <sub>4</sub>                | 330                                    | 67.7                                  | <i>Energy Environ. Sci.</i> 2017, 10, 2563         |
| Co <sub>3</sub> O <sub>4</sub> @CoO SC                        | 430                                    | 89                                    | <i>Nat. Commun.</i> 2015, 6, 8106                  |
| Au/Co <sub>3</sub> O <sub>4</sub>                             | 370                                    | 60                                    | <i>Adv. Mater.</i> 2014, 26, 3950                  |
| graphene-like holey Co <sub>3</sub> O <sub>4</sub> nanosheets | ~464                                   | 68                                    | <i>Nano Energy</i> 2016, 30, 267                   |
| Co <sub>3</sub> O <sub>4</sub> /N-PC                          | 390                                    | 72                                    | <i>Nano Energy</i> 2015, 12, 1                     |
| Reduced Co <sub>3</sub> O <sub>4</sub>                        | 400                                    | 72                                    | <i>Adv. Energy Mater.</i> 2014, 4, 1400696         |
| Co <sub>3-x</sub> O <sub>4</sub> -500                         | 367                                    | 57.2                                  | <i>ACS Catal.</i> 2018, 8, 3803                    |
| Co <sub>3-x</sub> O <sub>4</sub> -700                         | 376                                    | 58.9                                  |                                                    |
| BCN-Co <sub>3</sub> O <sub>4</sub>                            | 394                                    | -                                     | <i>RSC Adv.</i> 2016, 6, 79448                     |
| Co <sub>3</sub> O <sub>4</sub>                                | 368                                    | 59                                    | <i>J. Power Sources</i> 2016, 310, 41              |
| RGO-Co <sub>3</sub> O <sub>4</sub>                            | 410                                    | 85                                    | <i>J. Mater. Chem. A</i> 2016, 4, 13534            |
| 10%Ni-Co <sub>3</sub> O <sub>4</sub>                          | 370                                    | 83                                    | <i>ACS Appl. Mater. Interfaces</i> 2016, 8, 20802  |
| T-3D-Co <sub>3</sub> O <sub>4</sub>                           | 410                                    | 58                                    | <i>Chemelectrochem.</i> 2017, 4, 2453              |
| Co <sub>3</sub> O <sub>4</sub> sheets                         | 537                                    | 134                                   | <i>Nanoscale.</i> 2018, 10, 10221                  |
| Co <sub>3</sub> O <sub>4</sub> /NCMT-800                      | 350                                    | -                                     | <i>J. Mater. Chem. A.</i> 2017, 5, 20170           |

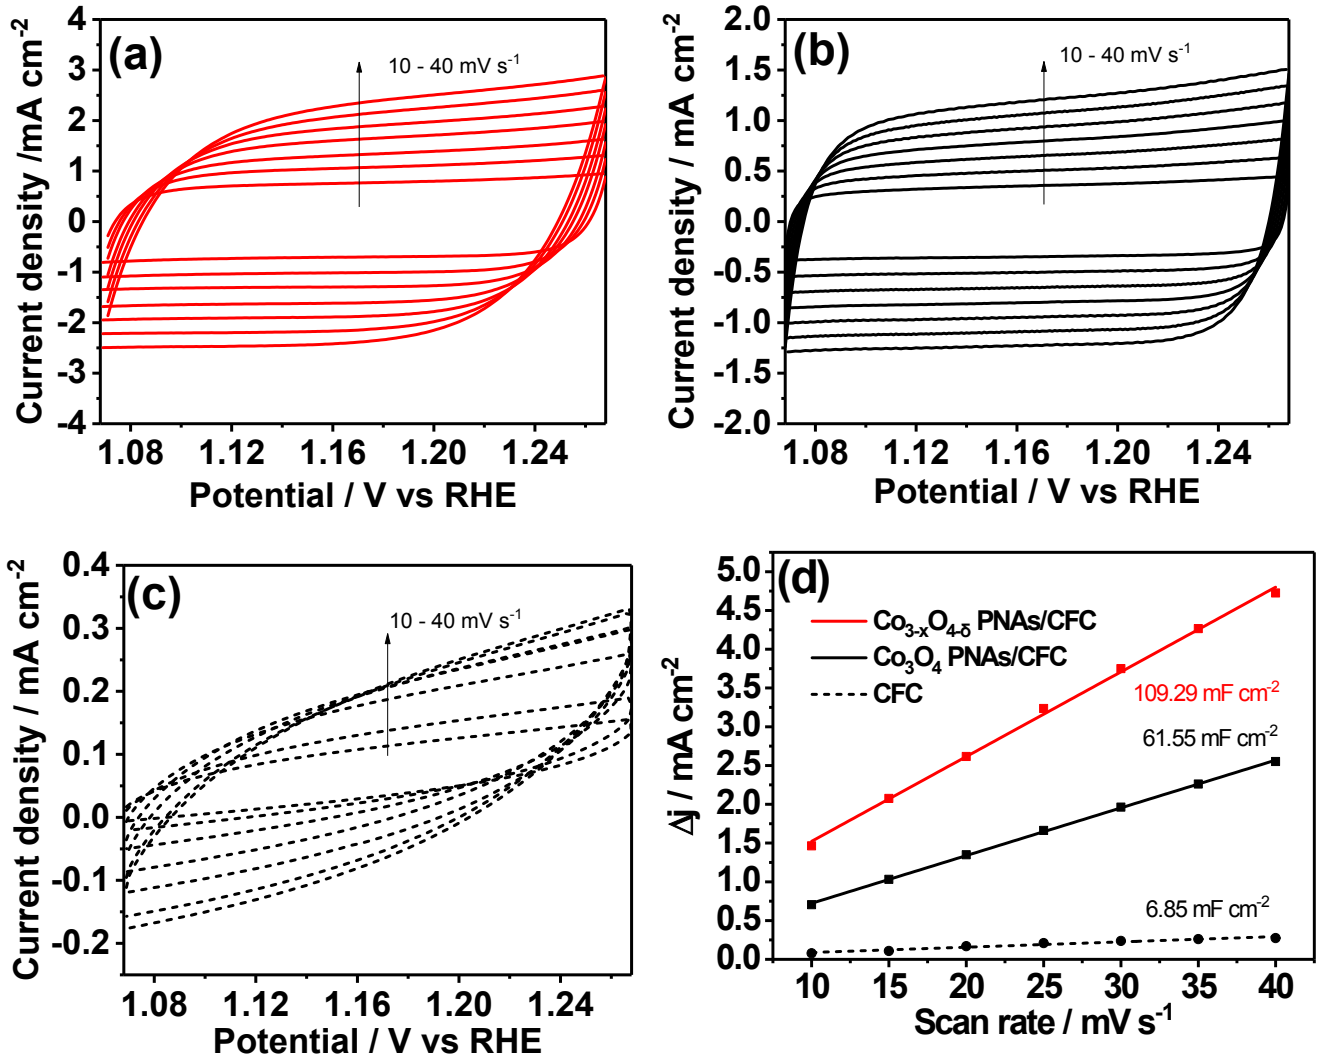

**Figure S16** CV curves of (a)  $\text{Co}_{3-x}\text{O}_{4-\delta}$  PNAs/CFC, (b)  $\text{Co}_3\text{O}_4$  PNAs/CFC and (c) CFC; (d) current density variation plotted against the scan rate, fitted to a linear regression, enables the estimation of the double layer capacitance ( $C_{dl}$ ).

The electrochemical active areas of  $\text{Co}_{3-x}\text{O}_{4-\delta}$  PNAs/CFC and  $\text{Co}_3\text{O}_4$  PNAs/CFC was determined by the formula:

$$R_f = \frac{C_{dl}}{60}$$

in which the  $C_{dl}$  of samples were deduced by the value of CFC, it was assumed that the  $C_{dl}$  of an ideal oxide's unit area is  $60 \mu\text{F cm}^{-2}$ .  $R_f$  is the roughness factor.

The electrochemical active area (ECSA) was calculated by the formula:

$$ECSA = R_f \times A$$

where A is the surface area of the electrode. [2]

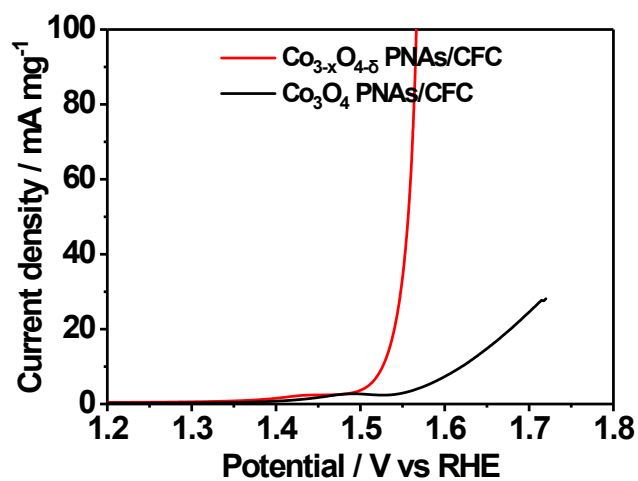

**Figure S17** LSV curves of (a)  $\text{Co}_{3-x}\text{O}_{4-\delta}$  PNAs/CFC and (b)  $\text{Co}_3\text{O}_4$  PNAs/CFC, normalized to the mass of  $\text{Co}_3\text{O}_4$ .

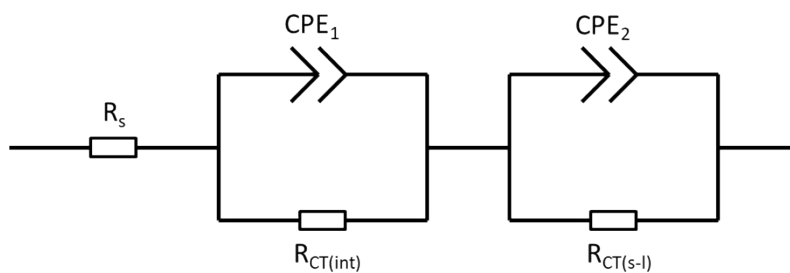

**Figure S18** The simplified equivalent circuit model of EIS.

**Table S3** The fitting factor of each circuit component of  $\text{Co}_{3-x}\text{O}_{4-\delta}$  PNAs/CFC and  $\text{Co}_3\text{O}_4$  PNAs/CFC.

| sample                                           | $R_{CT(int)}$ | $R_{CT(s-l)}$ | $R_s$ | $CPE_1$   | $CPE_2$ |
|--------------------------------------------------|---------------|---------------|-------|-----------|---------|
| $\text{Co}_{3-x}\text{O}_{4-\delta}$<br>PNAs/CFC | 0.5114        | 8.023         | 5.168 | 0.0005285 | 0.09841 |
| $\text{Co}_3\text{O}_4$<br>PNAs/CFC              | 8.679         | 25.45         | 6.221 | 0.0002209 | 0.04569 |

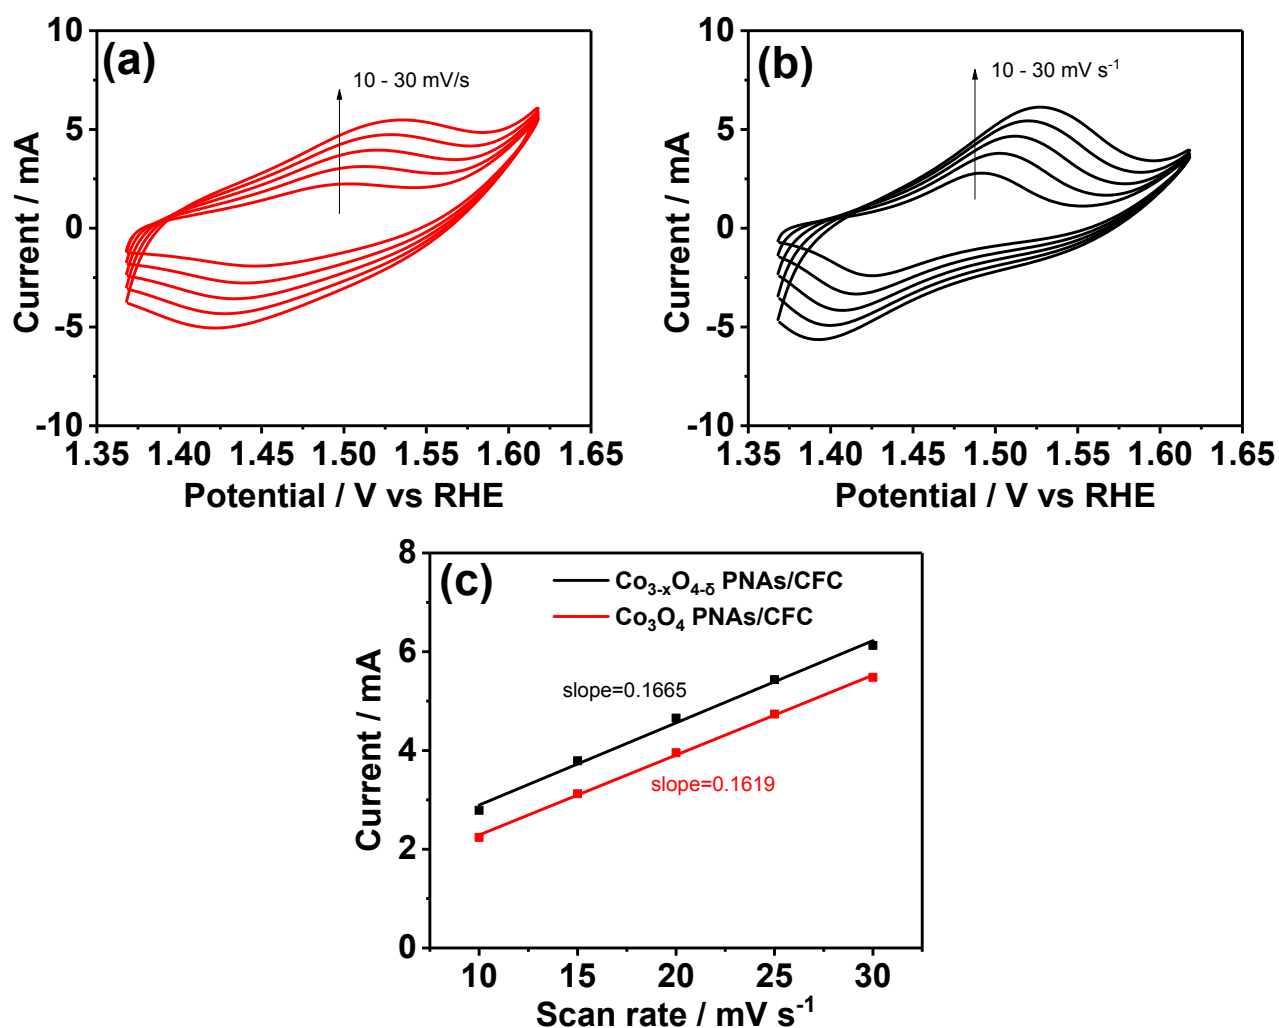

**Figure S19** CVs for (a)  $\text{Co}_{3-x}\text{O}_{4-\delta}$  PNAs/CFC and (b)  $\text{Co}_3\text{O}_4$  PNAs/CFC under different scan rates from 10 to 60  $\text{mV s}^{-1}$  in 1.0 M KOH; (c) linear relationship of the peak currents vs. scan rates for  $\text{Co}_{3-x}\text{O}_{4-\delta}$  PNAs/CFC and  $\text{Co}_3\text{O}_4$  PNAs/CFC at different fixed overpotentials.

The number of surface active sites associated with the redox Co species should be first calculated. The linear relationship between the oxidation peak current and the scan rate can be extracted from the electrochemical cyclic voltammetry scans.

The slope of the line can be calculated based on the following equation:

$$\text{Slope} = \frac{n^2 F^2 m}{4RT}$$

in which  $n$  is the number of electrons transferred in the redox of  $\text{Co}^{3+}/\text{Co}^{4+}$ ,  $F$  is the Faraday constant,  $m$  is the number of active sites (mol),  $R$  and  $T$  are the ideal gas constant and the absolute temperature, respectively.<sup>[3]</sup>

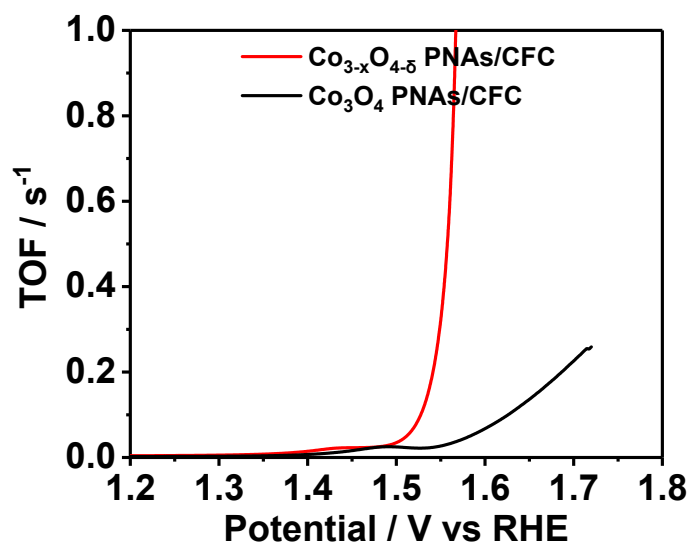

**Figure S20** TOF curves of  $\text{Co}_{3-x}\text{O}_{4-\delta}$  PNAs/CFC and  $\text{Co}_3\text{O}_4$  PNAs/CFC.

The TOF value can be finally calculated using the formula

$$TOF = \frac{JA}{4Fm}$$

in which TOF is based on the number of redox-active sites,  $J$  is the current density at a certain overpotential,  $A$  is the area of the electrode, 4 indicates the moles of electrons consumed for evolving one mole of  $\text{O}_2$  from  $\text{H}_2\text{O}$ ,  $F$  is the Faraday constant, and  $m$  is the number of moles of the active sites.<sup>[4]</sup>

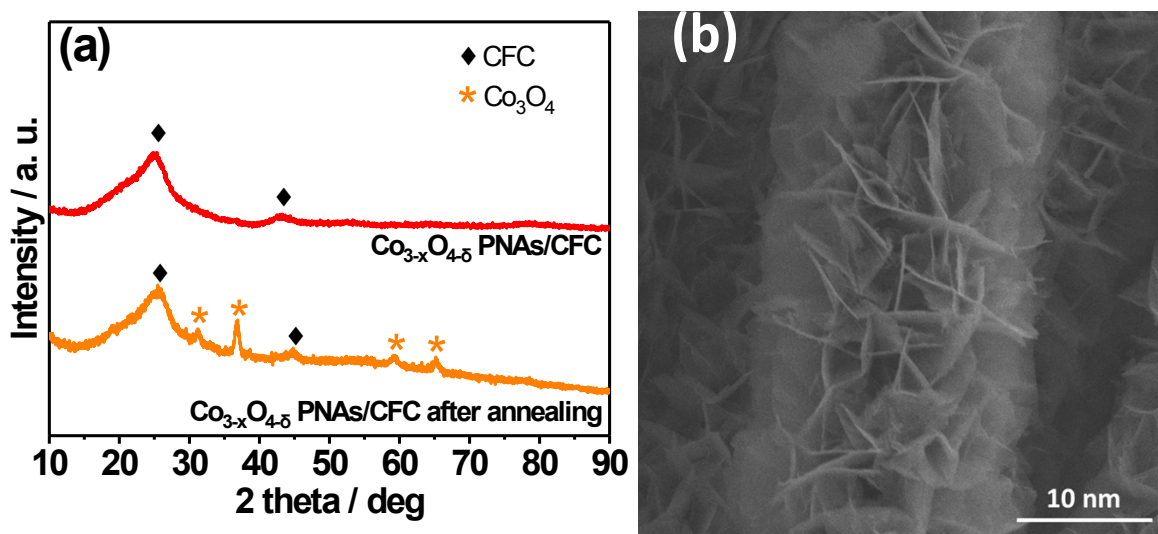

**Figure S21** (a) XRD patterns of  $\text{Co}_{3-x}\text{O}_{4-\delta}$  PNAs/CFC and  $\text{Co}_{3-x}\text{O}_{4-\delta}$  PNAs/CFC after annealing; (b) SEM image of  $\text{Co}_{3-x}\text{O}_{4-\delta}$  PNAs/CFC after annealing.

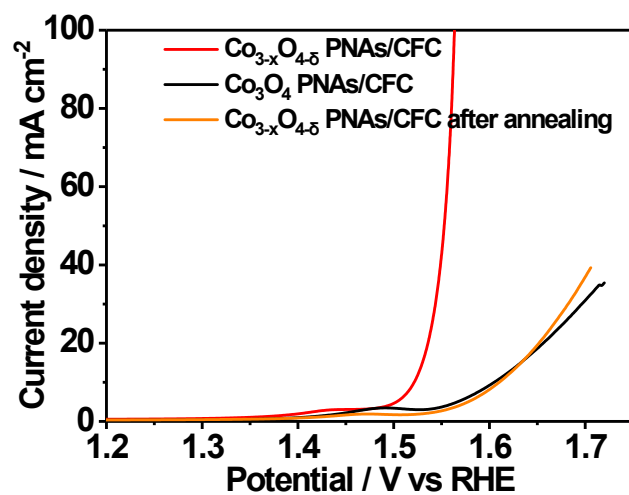

**Figure S22** LSV curves of Co<sub>3-x</sub>O<sub>4-δ</sub> PNAs/CFC, Co<sub>3</sub>O<sub>4</sub> PNAs/CFC and Co<sub>3-x</sub>O<sub>4-δ</sub> PNAs/CFC after annealing in 1 M KOH at 5 mV s<sup>-1</sup>.

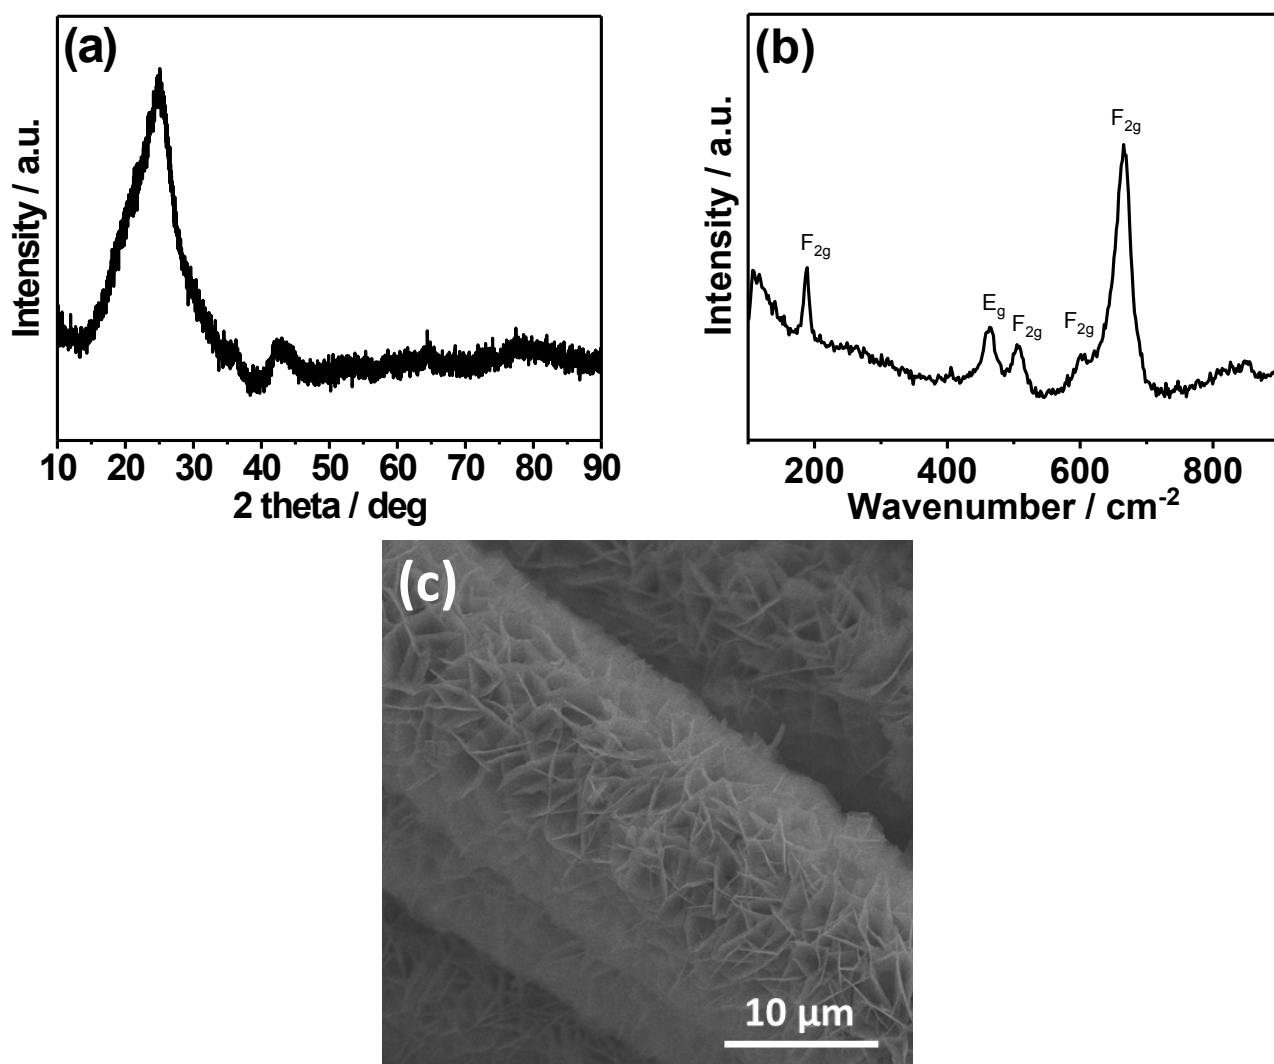

**Figure S23** (a) XRD pattern, (b) Raman spectrum, and (c) SEM image of Co<sub>3-x</sub>O<sub>4-δ</sub> PNAs/CFC after the durability test.

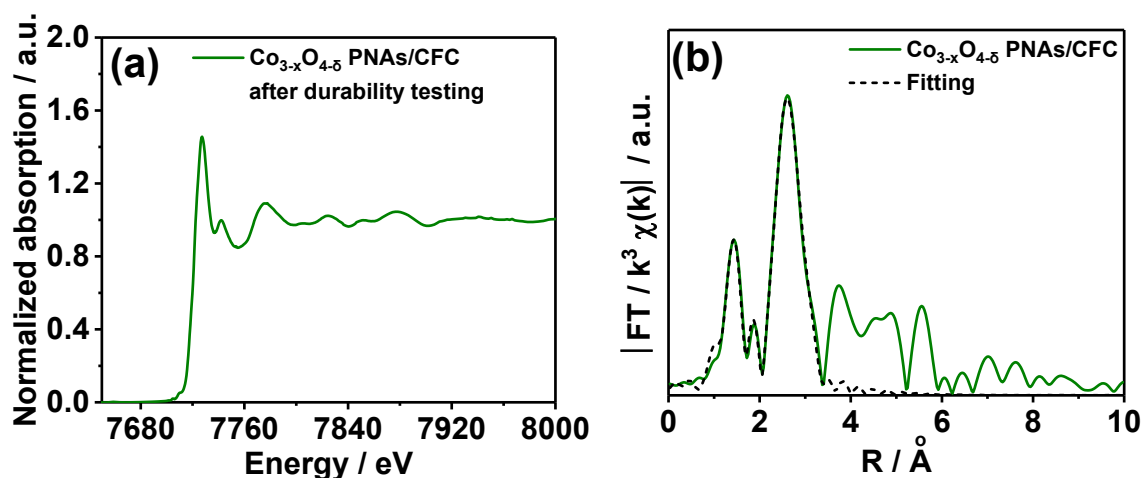

Figure S24 (a) XANES and (b) FT-EXAFS of  $\text{Co}_{3-x}\text{O}_{4-\delta}$  PNAs/CFC after the durability test.

Table S4. EXAFS fitting parameters at the Co K-edge for  $\text{Co}_{3-x}\text{O}_{4-\delta}$  PNAs/CFC after durability test.

| Sample                                                                                | Shell                              | CN <sup>a</sup> | R (Å) <sup>b</sup> | $\sigma^2$ (Å <sup>2</sup> ·10 <sup>3</sup> ) <sup>c</sup> | $\Delta E_0$ (eV) <sup>d</sup> | R |
|---------------------------------------------------------------------------------------|------------------------------------|-----------------|--------------------|------------------------------------------------------------|--------------------------------|---|
| <b>Co<sub>3-x</sub>O<sub>4-δ</sub><br/>PNAs/CFC<br/>after<br/>durability<br/>test</b> | Co-O                               | 2.5             | 1.91               | 3.9                                                        | -8.4                           |   |
|                                                                                       | Co <sub>Oh</sub> -Co <sub>Oh</sub> | 5.0             | 2.96               | 7.9                                                        |                                |   |
|                                                                                       | Co-Co <sub>Td</sub>                | 4.2             | 3.33               | 6.6                                                        | -6.7                           |   |

<sup>a</sup> CN: coordination numbers; <sup>b</sup> R: bond distance; <sup>c</sup>  $\sigma^2$ : Debye-Waller factors; <sup>d</sup>  $\Delta E_0$ : the inner potential correction. R factor: goodness of fit. S02, 0.847, was obtained from the experimental EXAFS fit of  $\text{Co}_3\text{O}_4$  reference by fixing CN as the known crystallographic value and was fixed to all the samples.

The EXAFS fitting parameters of  $\text{Co}_{3-x}\text{O}_{4-\delta}$  PNAs/CFC after durability test exhibited slightly change compared to those of  $\text{Co}_{3-x}\text{O}_{4-\delta}$  PNAs/CFC shown in Table S4. The CN of Co-O and Co-Co<sub>Td</sub> lowered after durability test, which means that long-term OER process at anodic potential may further induced the structural defects of Co tetrahedrons. Conversely, the CN of Co<sub>Oh</sub>-Co<sub>Oh</sub> slightly increased from 4.0 to 5.0, this phenomenon may be attributed to the measurement error of CN that is within 20% or little generation of  $\text{Co}(\text{OH})_2$  in the alkaline aqueous. XRD pattern and Raman spectrum shown in Figure S23 indicate that  $\text{Co}_{3-x}\text{O}_{4-\delta}$  PNAs/CFC remained low crystalline  $\text{Co}_3\text{O}_4$  phase without obvious impurity after durability test, thus we can conclude that microstructure didn't undergo large variation during the durability test.

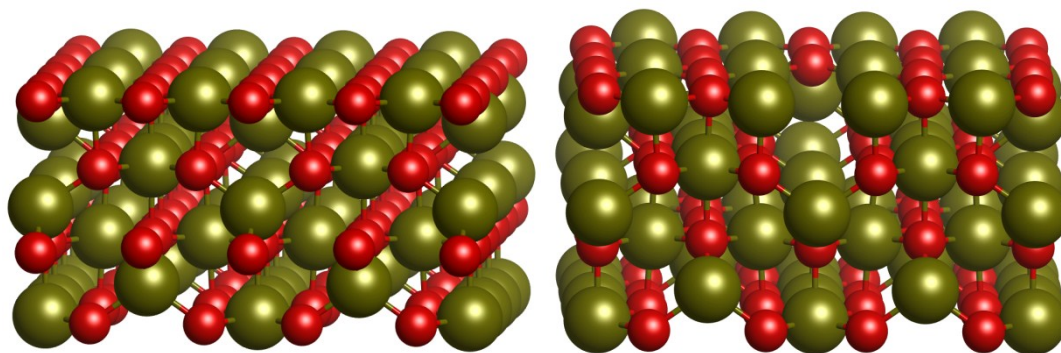

**Figure S25** Calculation models of (a) perfect  $\text{Co}_3\text{O}_4$  and (b)  $\text{Co}_{3-x}\text{O}_{4-\delta}$  with tetrahedral  $\text{CoO}_4$  vacancies.

**Table S5** Molecular energy used for calculations.

|        | $\text{H}_2\text{O}$ | $\text{OH}^-$ | $\text{O}_2$ | $\text{H}_2$ |
|--------|----------------------|---------------|--------------|--------------|
| G (eV) | -14.32259985         | -10.90832303  | -10.0680924  | -6.82855365  |

The energy of  $\text{O}_2$  was calculated by  $G(\text{O}_2) = G(2\text{H}_2\text{O}) - 2G(\text{H}_2) + 4.92 \text{ eV}$ .

The energy of  $\text{OH}^-$  was calculated by  $G(\text{OH}^-) = G(\text{H}_2\text{O}) - G(\text{H}^+)$ .

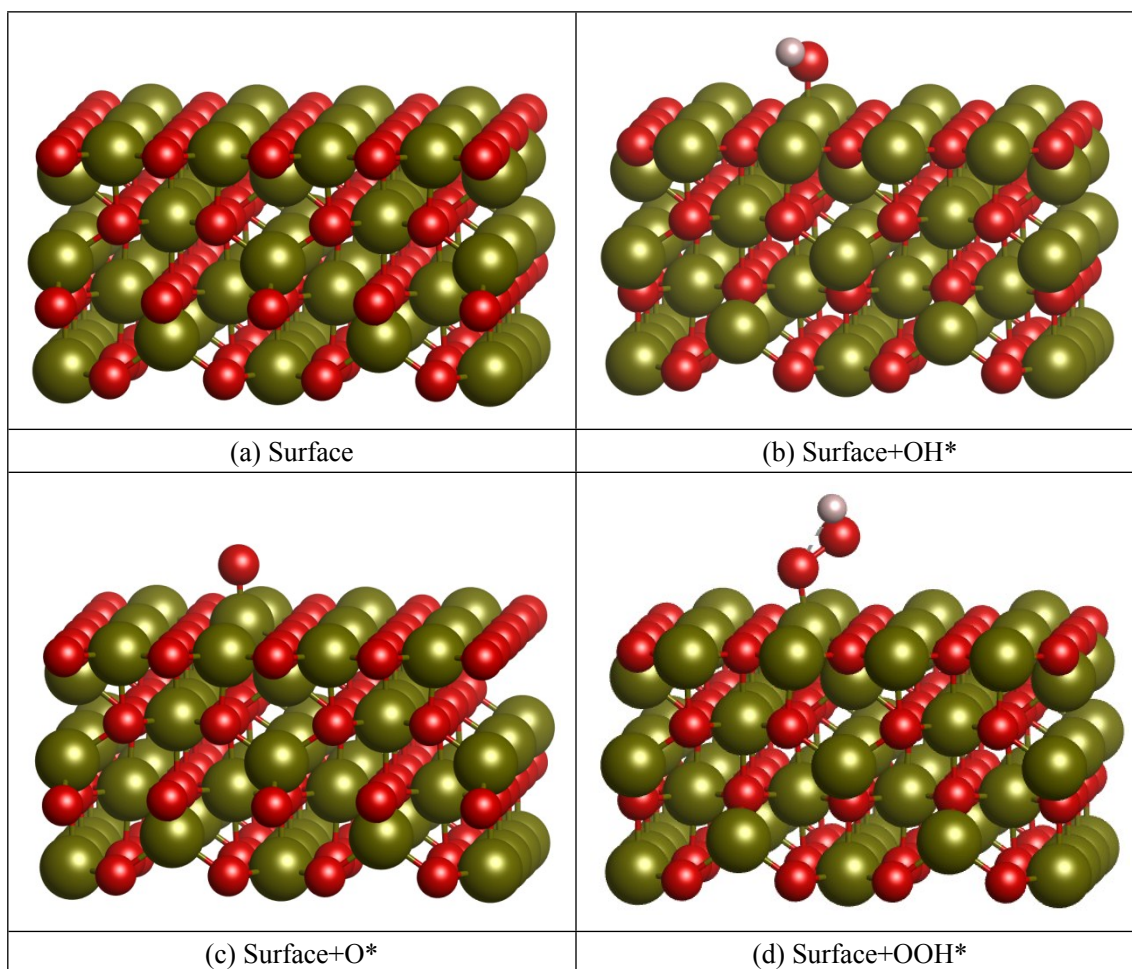

**Figure S26** Optimized configurations of (a) (001) of bare  $\text{Co}_3\text{O}_4$  and (b)  $\text{OH}^*$ , (c)  $\text{O}^*$ , (d)  $\text{OOH}^*$  species absorbed on (001) of  $\text{Co}_3\text{O}_4$ .



**Table S6** Energy of each intermediate species and variation of the Gibbs free energy of each elementary step of  $\text{Co}_3\text{O}_4$ .

|             | Energy (eV)   |              |             |
|-------------|---------------|--------------|-------------|
| Surface     | -714.61808813 | $\Delta G_1$ | 0.644141185 |
| Surface+OH  | -724.88226997 | $\Delta G_2$ | 2.013164385 |
| Surface+O   | -719.45482876 | $\Delta G_3$ | 1.112610255 |
| Surface+OOH | -729.25054153 | $\Delta G_4$ | 1.150084175 |

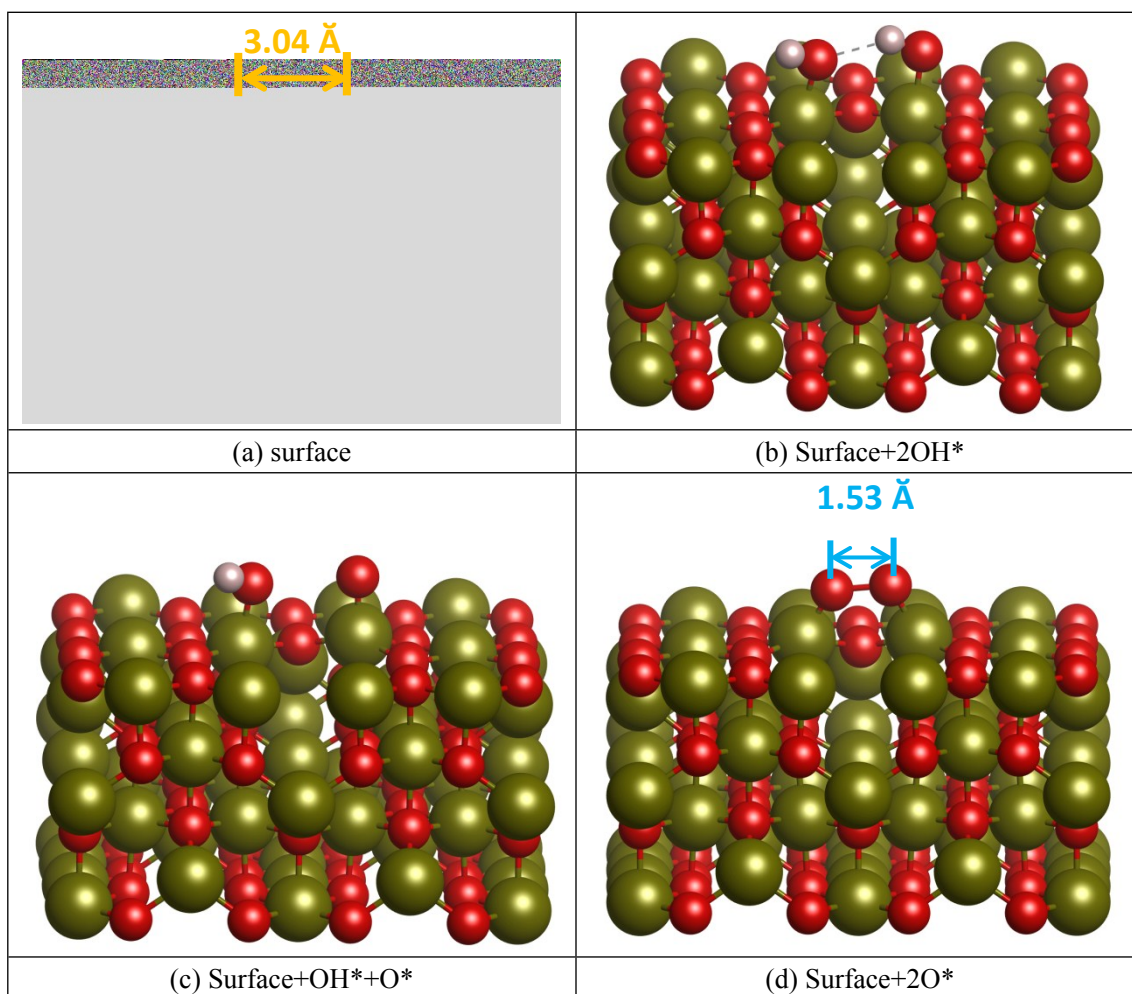**Figure S27** Optimized configurations of (a) (001) of bare  $\text{Co}_{3-x}\text{O}_{4-\delta}$  and (b)  $2\text{OH}^*$ , (c)  $\text{OH}^* + \text{O}^*$ , and (d)  $2\text{O}^*$  species absorbed on the oxygen vacancies on (001) of  $\text{Co}_{3-x}\text{O}_{4-\delta}$ .**Table S7** Energy of each intermediate species and variation of the Gibbs free energy of each elementary steps of  $\text{Co}_{3-x}\text{O}_{4-\delta}$ .

|              | Energy (eV)   |              |             |
|--------------|---------------|--------------|-------------|
| Surface      | -691.98087440 | $\Delta G_1$ | 0.51455471  |
| Surface+2OH  | -713.28296574 | $\Delta G_2$ | 1.911768845 |
| Surface+OH+O | -707.95692007 | $\Delta G_3$ | 1.425043005 |
| Surface+2O   | -703.11760024 | $\Delta G_4$ | 1.06863344  |

## References

- [1] S. Meher, G. Rao. *J. Phys. Chem. C* **2011**, *115*, 25543-25556.
- [2] R. Zhang, Y. Zhang, L. Pan, G. Shen, N. Mahmood, Y. Ma, Y. Shi, W. Jia, L. Wang, X. Zhang, W. Xu, J. Zou. *ACS Catal.* **2018**, *8*, 3803-3811.
- [3] D. Wu, Y. Wei, X. Ren, X. Ji, Y. Liu, X. Guo, Z. Liu, A. Asiri, Q. Wei, X. Sun. *Adv. Mater.* **2018**, *30*, 1705366.
